# Supplementary material for: Starting Antihypertensive Drug Treatment With Combination Therapy: Controversies in Hypertension - Con Side of the Argument
Source: PubMed Central journal article supplement — Hypertension. 2021 Feb 11;77(3):788–98. doi: 10.1161/HYPERTENSIONAHA.120.12858 (PMC7884241; doi:10.1161/hypertensionaha.120.12858), 2021-02-11
Supplement: hyp-77-788-s003.pdf [file hyp-77-788-s003.pdf]

**From:** Jan A Staessen  
**To:** [Hypertension](#)  
**Subject:** Re: HYPE201912858R2 - Table permission  
**Date:** Saturday, October 24, 2020 2:03:27 AM

---

\*\*\* **CAUTION:** This email originated from outside of the **American Heart Association**. Do **not** click links or open attachments unless you recognize the sender and know the content is safe. \*\*\*

Renata,

None of the Table contents requires permission. The data from guidelines or from published articles are all properly cited.

Sincerely,

Jan A. Staessen

---

**From:** hypertension@heart.org <hypertension@heart.org>  
**Sent:** 23 October 2020 20:03  
**To:** Jan A Staessen  
**Subject:** HYPE201912858R2 - Table permission

23-Oct-2020

MS ID#: HYPE201912858R2  
MS TITLE: Starting Antihypertensive Treatment with Combination Therapy: Con Side of the Argument

Dear Prof. Staessen,

Thanks for sending your files. We only needed corrections for figure 3. Also, we still need information about table permission as it follows:

- Legends of table 1 and supplemental tables refers to several references in the text of the manuscript. Please provide permission to reprint or include a statement that permission is not necessary (and why) by e-mail.

Sincerely,

Renata Gil  
Hypertension Editorial Office

///

Renata,

You requested all Figures in EPS format, but the website only allowed me to upload Figure 3.

Attached to this email, you will find:

- The cover letter;
- The permission to reproduce Figure 2 and 3 - not needed for Figure 1 (see Cover Letter);
- Figures 1 and 2 in EPS format.

Kind regards,

Jan A. Staessen

Please click on the link below to log in to the system.

[https://hype-submit.aha-journals.org/cgi-bin/main.plex?  
el=A3Hm3BrR3A7jO5J1A9ftdwQGB1mdAoff7SaPZXEpTlgZ](https://hype-submit.aha-journals.org/cgi-bin/main.plex?el=A3Hm3BrR3A7jO5J1A9ftdwQGB1mdAoff7SaPZXEpTlgZ)
